# Supplementary material for: Self-assembled microrings of Au nanoparticle and Au nanorod clusters formed at the equators of Janus particles
Source: Royal Society of Chemistry journal article supplement (doi:10.1039/c9ra02767j), 2019-01-01
Supplement: c9ra02767j1.pdf [file c9ra02767j1.pdf]

Electronic Supplemental Information

## Self-Assembled Microrings of Au Nanoparticles and Au Nanorods Formed at the Equators of Janus Particles

Yutaro Hirai and Hiroshi Yabu\*

*WPI-Advanced Institute for Materials Research (AIMR), Tohoku University, 2-1-1, Katahira, Aoba-Ku, Sendai 980-8577, Japan*

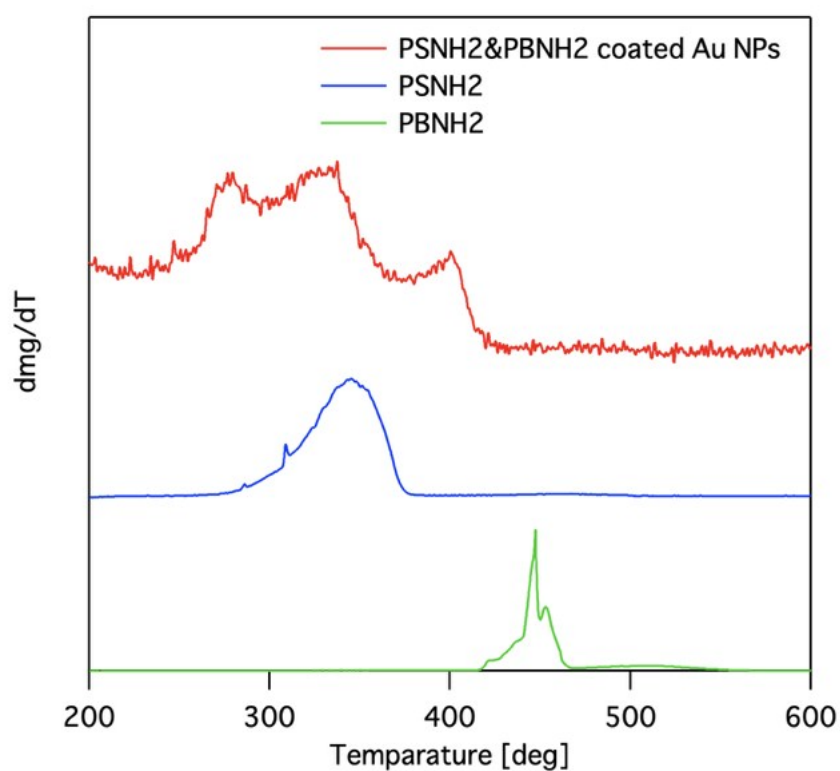

**Figure S1.** Differential TG curves of Au NPs@PS-NH<sub>2</sub>/PB-NH<sub>2</sub> (black), PS-NH<sub>2</sub> (blue) and PB-NH<sub>2</sub> (green), respectively.

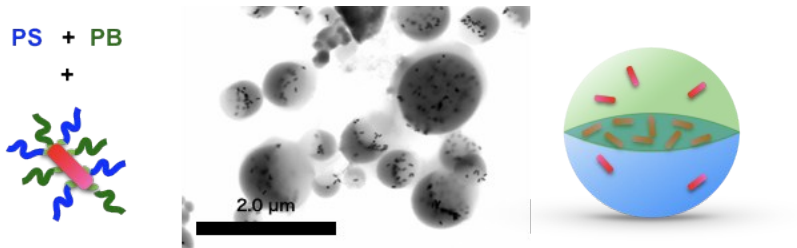

Figure S2. Schematic illustration of polymer-coated Au NRs, STEM image and model of Au NRs@PS-NH<sub>2</sub>/PB-NH<sub>2</sub> in Janus particles before annealing.
